# Supplementary material for: Consumption of Sugar-Sweetened or Artificially Sweetened Beverages and Semen Quality in Young Men: A Cross-Sectional Study
Source: MDPI journal article supplement (doi:10.3390/ijerph19020682), 2022-01-07
Supplement: s1 [file s1]

**Table S1:** Adjusted outcome ratios with and without BMI adjustment according to sugar-sweetened and artificially sweetened beverage consumption among participants, FEPOS 2017-2019

|                                   | <b>Sugar-sweetened beverage consumption</b> | <b>Sugar-sweetened beverage consumption</b> | <b>Artificially sweetened beverage consumption</b> | <b>Artificially sweetened beverage consumption</b> |
|-----------------------------------|---------------------------------------------|---------------------------------------------|----------------------------------------------------|----------------------------------------------------|
|                                   | Adjusted ratio and 95% CI <sup>a,b</sup>    | Adjusted ratio and 95% CI <sup>a,c</sup>    | Adjusted ratio and 95% CI <sup>a,b</sup>           | Adjusted ratio and 95% CI <sup>a,c</sup>           |
| <b>Semen parameters</b>           |                                             |                                             |                                                    |                                                    |
| Semen volume <sup>d</sup>         | 0.98 (0.91, 1.07)                           | 0.98 (0.90, 1.07)                           | 1.04 (0.93, 1.17)                                  | 1.04 (0.93, 1.18)                                  |
| Sperm concentration               | 1.02 (0.89, 1.17)                           | 1.02 (0.89, 1.17)                           | 0.97 (0.81, 1.16)                                  | 0.97 (0.81, 1.15)                                  |
| Total motility <sup>e</sup>       | 0.98 (0.95, 1.02)                           | 0.98 (0.95, 1.02)                           | 1.01 (0.98, 1.05)                                  | 1.01 (0.98, 1.05)                                  |
| Sperm morphology (% normal sperm) | 1.02 (0.91, 1.15)                           | 0.99 (0.88, 1.13)                           | 0.89 (0.76, 1.04)                                  | 0.88 (0.76, 1.03)                                  |
| Total sperm count <sup>d</sup>    | 0.98 (0.84, 1.14)                           | 0.98 (0.84, 1.14)                           | 0.99 (0.81, 1.21)                                  | 1.00 (0.82, 1.23)                                  |

<sup>a</sup>Ratio between the semen quality characteristics for moderate consumption (≥3 days per week) relative to infrequent consumption (<3 days per week)

<sup>b</sup>Adjusted for candy intake, cake intake, energy drink consumption, coffee consumption, smoking, maternal smoking, maternal BMI, parental socio-economic status, abstinence time and fever

<sup>c</sup>Adjusted for BMI, candy intake, cake intake, energy drink consumption, coffee consumption, smoking, maternal smoking, maternal BMI, parental socio-economic status, abstinence time and fever

<sup>d</sup>Participants with recording of spillage excluded from analyses on semen volume and total sperm count (mill.)

<sup>e</sup>Analyses on total motility (A + B %) additionally adjusted for time to analysis

**Table S2:** Adjusted outcome ratios including unhealthy diet according to sugar-sweetened beverage consumption among participants, FEPOS 2017-2019

| Semen parameters                     | Sugar-sweetened beverage consumption     |
|--------------------------------------|------------------------------------------|
|                                      | Adjusted ratio and 95% CI <sup>a,b</sup> |
| Semen volume <sup>c</sup>            | 1.00 (0.93, 1.08)                        |
| Sperm concentration                  | 1.00 (0.88, 1.13)                        |
| Total motility <sup>d</sup>          | 0.98 (0.96, 1.01)                        |
| Sperm morphology<br>(% normal sperm) | 1.00 (0.90, 1.11)                        |
| Total sperm count <sup>c</sup>       | 0.96 (0.84, 1.01)                        |

<sup>a</sup>Ratio between the semen quality characteristics for moderate consumption (≥3 days per week) relative to infrequent consumption (<3 days per week)

<sup>b</sup>Adjusted for unhealthy diet, energy drink consumption, coffee consumption, smoking, maternal smoking, maternal BMI, parental socio-economic status, abstinence time and fever

<sup>c</sup>Participants with recording of spillage excluded from analyses on semen volume and total sperm count (mill.)

<sup>d</sup>Analyses on total motility (A + B %) additionally adjusted for time to analysis

**Supplementary Table S3:** Adjusted outcome ratios including varicocele according to sugar-sweetened or artificially sweetened beverage consumption among participants, FEPOS 2017-2019

|                                      | <b>Sugar-sweetened beverage consumption</b> | <b>Artificially sweetened beverage consumption</b> |
|--------------------------------------|---------------------------------------------|----------------------------------------------------|
|                                      | Adjusted ratio and 95% CI <sup>a,b</sup>    | Adjusted ratio and 95% CI <sup>a,b</sup>           |
| <b>Semen parameters</b>              |                                             |                                                    |
| Semen volume <sup>c</sup>            | 0.99 (0.91, 1.07)                           | 1.03 (0.92, 1.16)                                  |
| Sperm concentration                  | 1.03 (0.89, 1.18)                           | 0.96 (0.81,1.14)                                   |
| Total motility <sup>d</sup>          | 0.98 (0.95, 1.02)                           | 1.01 (0.98, 1.05)                                  |
| Sperm morphology<br>(% normal sperm) | 0.98 (0.86, 1.11)                           | 0.89 (0.77, 1.04)                                  |
| Total sperm count <sup>c</sup>       | 0.97 (0.83, 1.14)                           | 0.98 (0.80, 1.20)                                  |

<sup>a</sup>Ratio between the semen quality characteristics for moderate consumption (≥3 days per week) relative to infrequent consumption (<3 days per week)

<sup>b</sup>Adjusted for candy intake, cake intake, energy drink consumption, coffee consumption, smoking, maternal smoking, maternal BMI, parental socio-economic status, abstinence time, varicocele, and fever

<sup>c</sup>Participants with recording of spillage excluded from analyses on semen volume and total sperm count (mill.)

<sup>d</sup>Analyses on total motility (A + B %) additionally adjusted for time to analysis
